# Supplementary material for: Photorespiration Alleviates Photoinhibition of Photosystem I under Fluctuating Light in Tomato
Source: MDPI journal article supplement (doi:10.3390/plants11020195), 2022-01-12
Supplement: s1 [file s1]

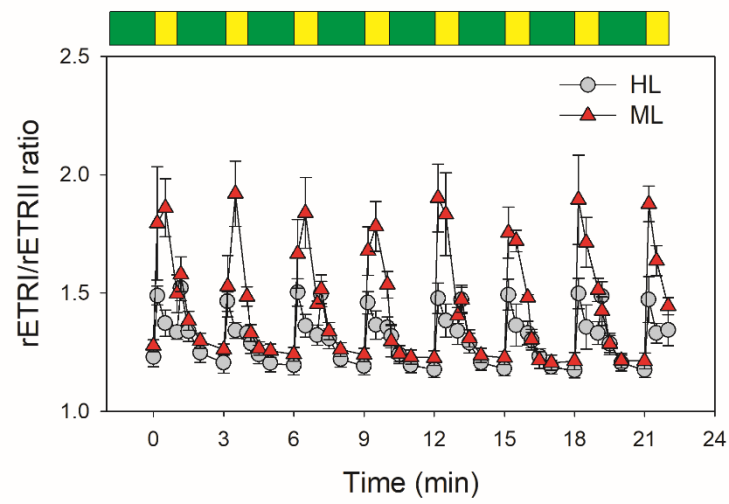

**Figure S1.** Changes in the rETR/rETRII ratio during fluctuating light in HL- and ML-plants of tomato. Green bars indicate low light ( $59 \mu\text{mol photons m}^{-2} \text{s}^{-1}$ ); yellow bars indicate high light ( $1455 \mu\text{mol photons m}^{-2} \text{s}^{-1}$ ). Data are shown as means  $\pm$  SE ( $n = 5$ ).
